# Supplementary material for: Fully-printed flexible n-type tin oxide thin-film transistors and logic circuits
Source: Royal Society of Chemistry journal article supplement (doi:10.1039/d1tc01512e), 2021-01-01
Supplement: d1tc01512e1.pdf [file d1tc01512e1.pdf]

## Electronic Supplementary Materials

For

### Fully-Printed Flexible Tin Oxide Thin-Film Transistors and Logic Circuits

Kun Liang,<sup>a,b</sup> Huihui Ren,<sup>a,b</sup> Dingwei Li,<sup>a,b</sup> Yan Wang,<sup>b</sup> Yingjie Tang,<sup>b</sup> Momo Zhao,<sup>b,c</sup>  
Hong Wang,<sup>c</sup> Wenbin Li,<sup>b,d</sup> and Bowen Zhu<sup>b,d\*</sup>

- a. Zhejiang University, Hangzhou 310027, China.
- b. Key Laboratory of 3D Micro/Nano Fabrication and Characterization of Zhejiang Province, School of Engineering, Westlake University, Hangzhou 310024, China.
- c. Key Laboratory of Wide Band Gap Semiconductor Technology, School of Microelectronics, Xidian University, Xi'an 710071, China.
- d. Institute of Advanced Technology, Westlake Institute for Advanced Study, Hangzhou 310024, China.

\*Email: [zhubowen@westlake.edu.cn](mailto:zhubowen@westlake.edu.cn)

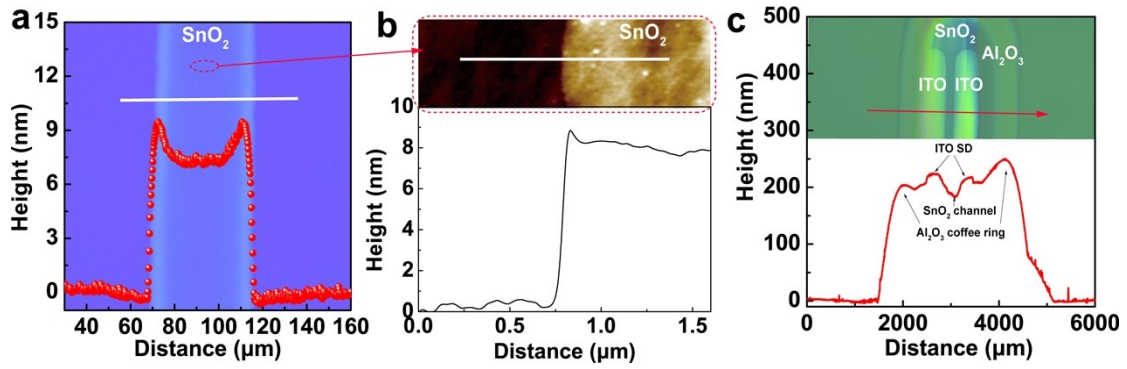

**Fig. S1.** Height profiles of printed SnO<sub>2</sub> films and TFTs. (a) Optical image and height profile of printed SnO<sub>2</sub> channel. The height was measured by a surface profilometer. (b) AFM image and corresponding height profile of printed SnO<sub>2</sub> film in the central area of the (a). (c) Stylus profilometer scan of the fully-printed SnO<sub>2</sub> TFT. The red arrow indicates scanning direction.

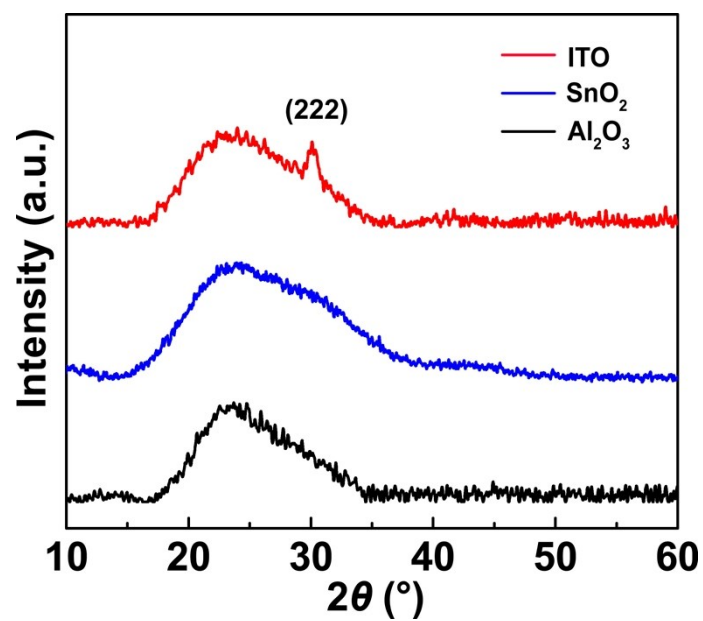

**Fig. S2.** XRD patterns of the ITO, SnO<sub>2</sub>, and Al<sub>2</sub>O<sub>3</sub> films on glass substrate. The diffraction peaks of the ITO film on the (222) crystal plane indicate its polycrystalline structure. No obvious diffraction peaks could be observed in SnO<sub>2</sub> and Al<sub>2</sub>O<sub>3</sub> films. The samples were prepared by spin-coating of the same precursor ink solution and annealing condition as printed films.

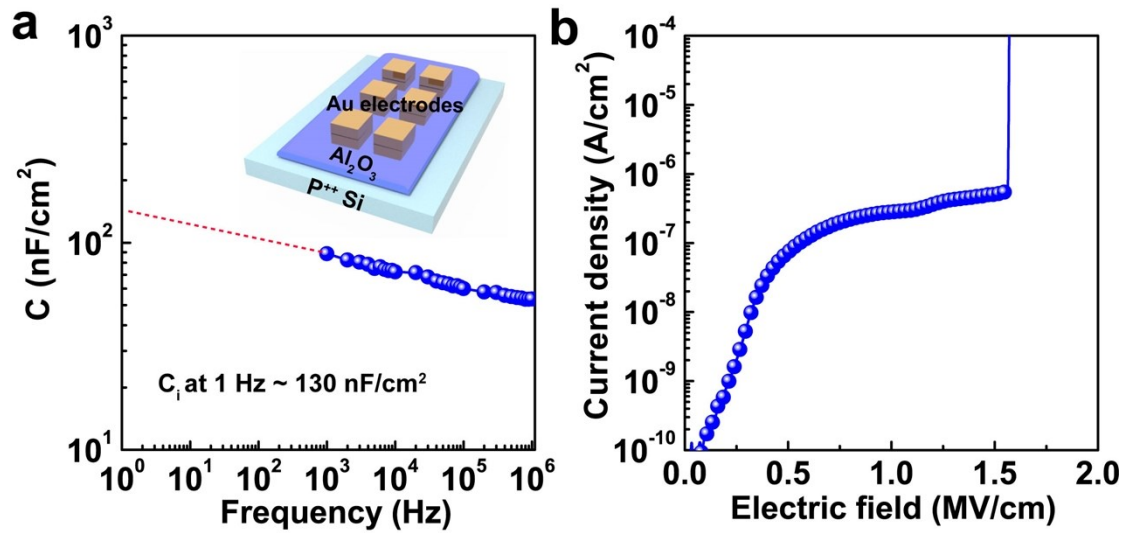

**Fig. S3.** Electrical properties of printed  $\text{Al}_2\text{O}_3$  dielectric film. (a) Areal capacitance-frequency curve of printed  $\text{Al}_2\text{O}_3$  film measured with a metal-insulator-metal (MIM) structure, with Au and highly doped Si ( $p^{++}$ ) as the top and bottom electrodes, respectively. The areal capacitance value of the  $\text{Al}_2\text{O}_3$  dielectric ( $C_i$ ) was  $\sim 130 \text{ nF cm}^{-2}$  extrapolated to 1 Hz. (b) Leakage current density of the MIM structure as a function of applied electric field.

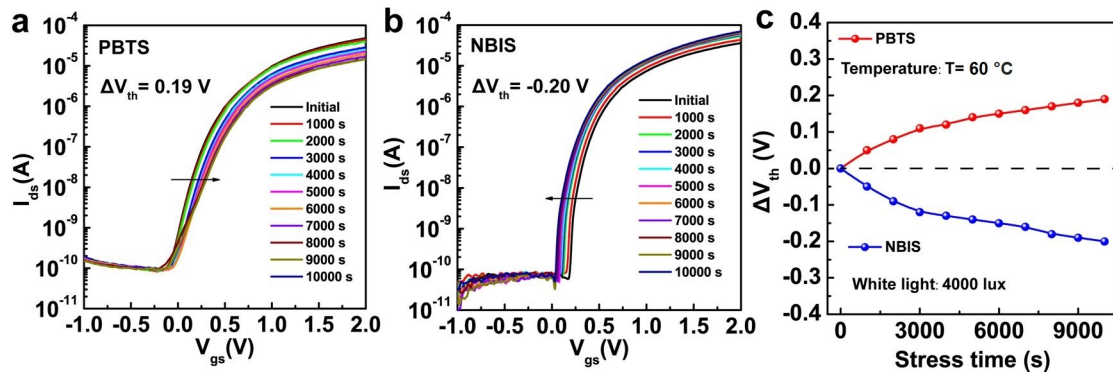

**Fig. S4.** Evolution of transfer curves of the fully printed SnO<sub>2</sub> TFTs as a function of (a) PBTS and (b) NBIS. (c) Threshold voltage shifts ( $\Delta V_{th}$ ) as a function of bias stress time. The PBTS test was carried out in air at 60 °C for 10000 s, and the applied gate bias was 1 V. The NBIS was performed in air at room temperature under white LED light illumination (4000 lux), and the applied gate bias was -1 V.

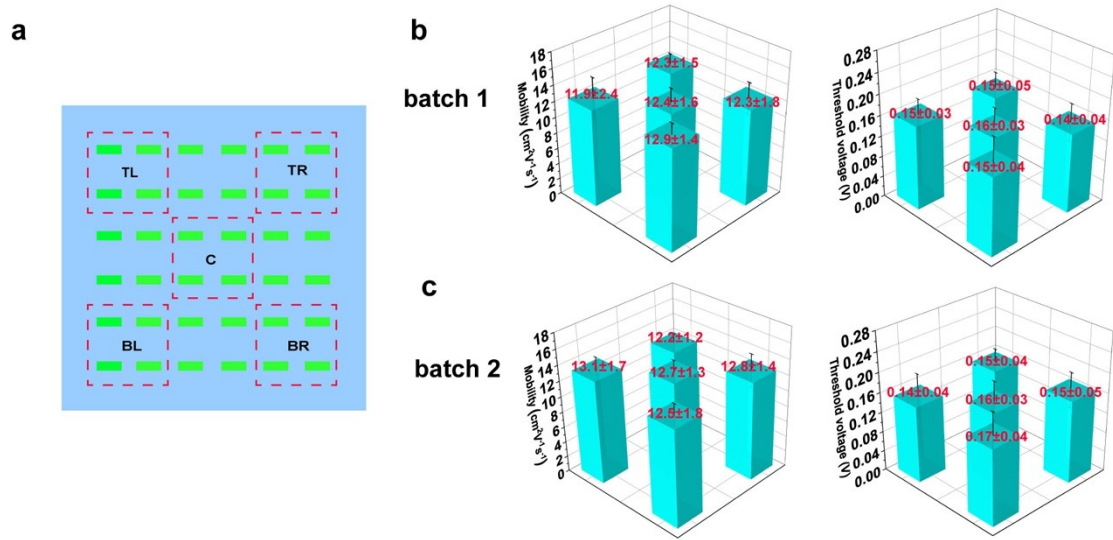

**Fig. S5.** Probabilistic histograms of the mobility ( $\mu_{sat}$ ) and  $V_{th}$  values of 80 printed devices from 4 sample substrates (fabricated from 2 batches, each batch contains 2 sample substrates). (a) Devices located at 5 different areas in each substrate were measured: top left (TL), top right (TR), bottom left (BL), bottom right (BR), and center area (C). 4 TFTs at each area were measured. In total, the parameters from 80 TFTs were collected (4 substrates  $\times$  5 area  $\times$  4 devices). (b-c) Average  $\mu_{sat}$  and  $V_{th}$  values from two batches, showing high uniformity with deviations less than 10%.

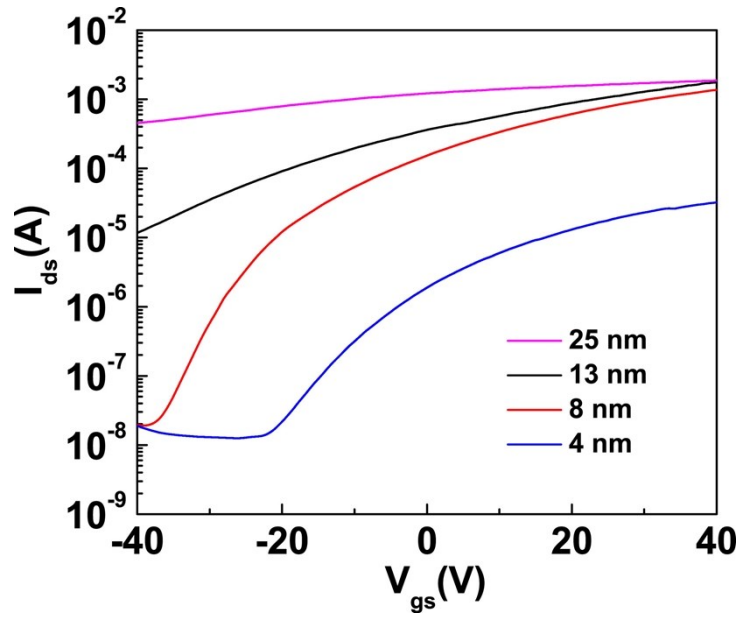

**Fig. S6.** Transfer curves of SnO<sub>2</sub> TFTs with different channel thicknesses fabricated on Si substrate with 100 nm thick SiO<sub>2</sub> gate dielectric.

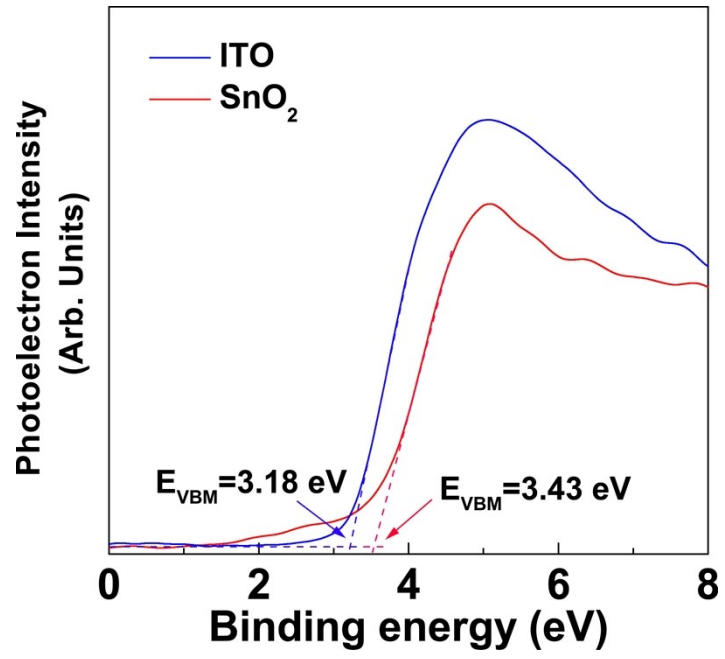

Fig. S7. Valence band spectra of ITO and SnO<sub>2</sub> films.



**Table S1. Electrical properties of SnO<sub>2</sub> TFTs with SiO<sub>2</sub> gate dielectric.**

| <b>SnO<sub>2</sub> thickness<br/>(nm)</b> | <b><math>\mu_{\text{sat}}</math><br/>(cm<sup>2</sup> V<sup>-1</sup> s<sup>-1</sup>)</b> | <b><math>V_{\text{th}}</math><br/>(V)</b> | <b>SS<br/>(V dec<sup>-1</sup>)</b> | <b><math>I_{\text{on}}/I_{\text{off}}</math></b> |
|-------------------------------------------|-----------------------------------------------------------------------------------------|-------------------------------------------|------------------------------------|--------------------------------------------------|
| 4                                         | 0.3                                                                                     | -11.4                                     | 6.8                                | 2.5×10 <sup>3</sup>                              |
| 8                                         | 6.8                                                                                     | -20.2                                     | 4.4                                | 9.2×10 <sup>4</sup>                              |
| 13                                        | /                                                                                       | /                                         | /                                  | /                                                |
| 25                                        | /                                                                                       | /                                         | /                                  | /                                                |
